# Supplementary material for: Isolation of Mutants of the Nitrogen-Fixing Actinomycete Frankia
Source: PubMed Central journal article supplement (PMC4041240; doi:10.1264/jsme2.me13126), 2013-12-28
Supplement: 29_31_s1.pdf [file 29_31_s1.pdf]

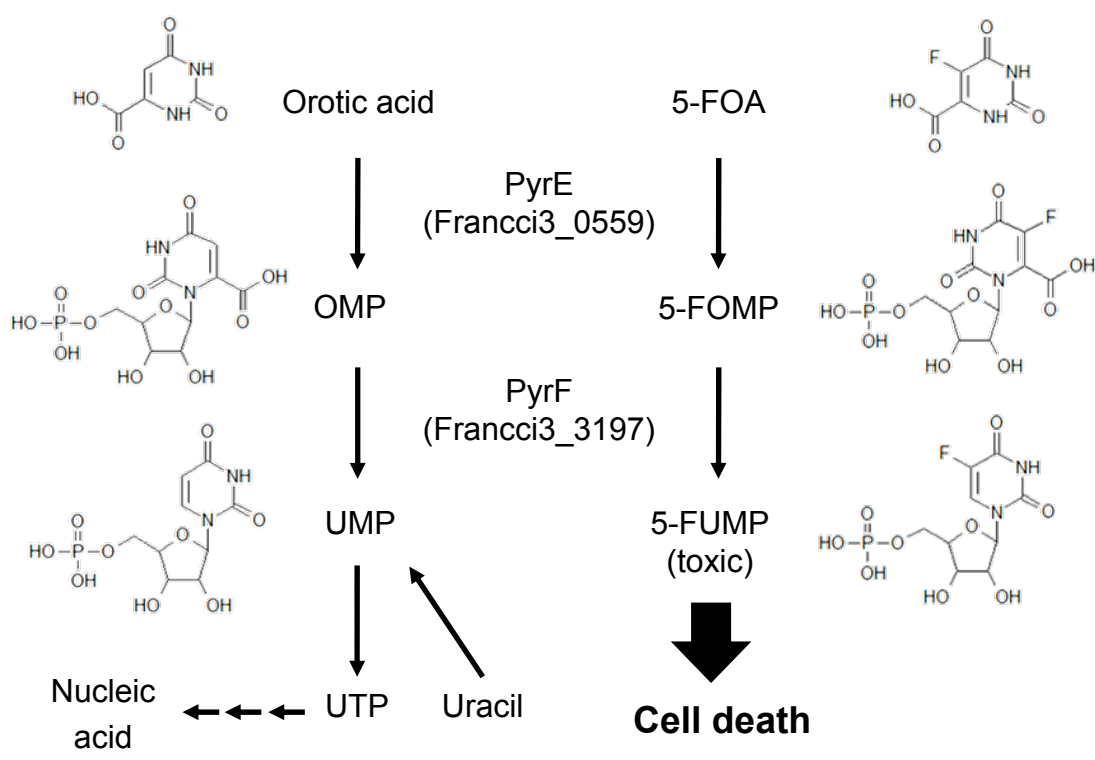

Fig. S1. Schematic diagram of metabolism of orotic acid and its fluorinated analog (5-FOA).

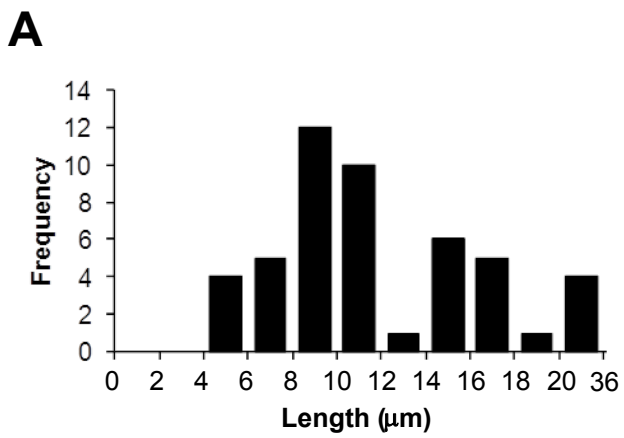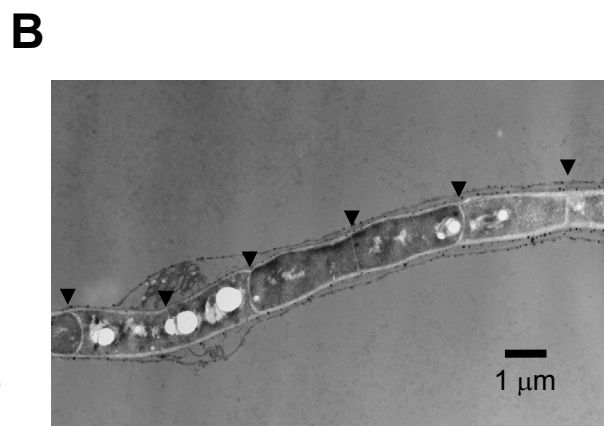

Fig. S2. (A) Histogram of length of filtrated hyphae ( $n = 48$ ). (B) Hyphae of *Frankia* Ccl3 observed by transmission electron microscopy (TEM). Septum is indicated by arrowhead.

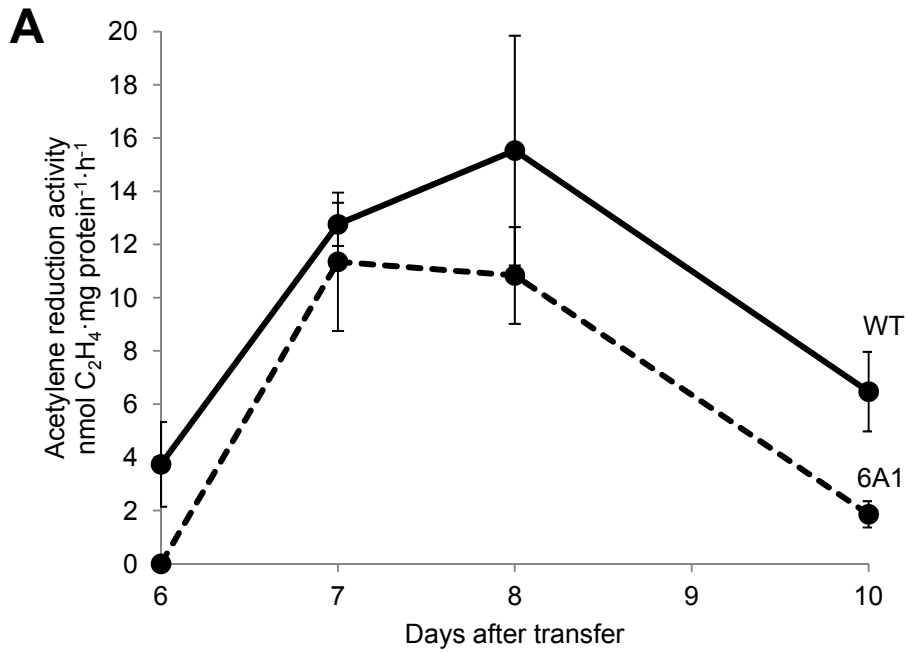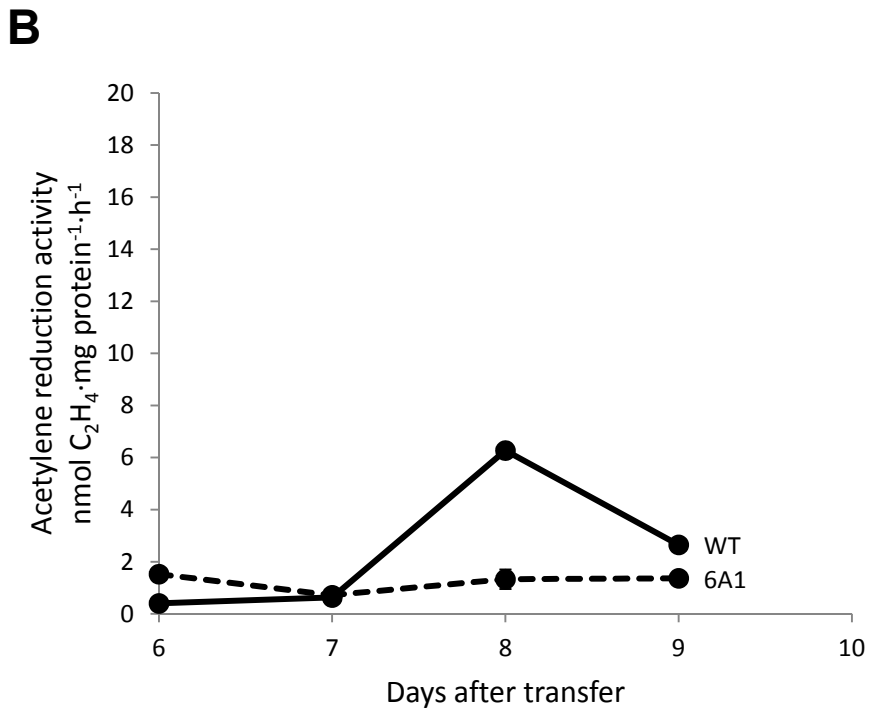

Fig. S3. Acetylene reduction activity of 6A1 and wild type (WT) during 6 to 10 days after transfer to CBminN- media. The dot and bar represent average and SE, respectively, from three independent determinations. Results from two additional experiments are shown (A and B).

Table S1. List of primers used in this study.

| Strain             | Direction | Position <sup>a</sup> | Length | Sequence(5' to 3' )  |
|--------------------|-----------|-----------------------|--------|----------------------|
| <i>pyrE</i> mutant | Forward   | 650818                | 20     | ATCATGCTTCTACACGGGCT |
| <i>pyrE</i> mutant | Reverse   | 651528                | 19     | GATGACATGAGGCAACGGT  |
| <i>pyrF</i> mutant | Forward   | 3787819               | 20     | AAGGCTTTGACGGACGAAAG |
| <i>pyrF</i> mutant | Reverse   | 3788902               | 20     | ATCGTTGCAGGAATACCACG |
| 6A1                | Forward   | 4476075               | 15     | CTTCGCGATAGCCGA      |
| 6A1                | Reverse   | 4476548               | 15     | CCAGCGAGTCGTTGA      |
| colony1            | Forward   | 4549220               | 17     | CCGAAGGTGCCAAGGTA    |
| colony1            | Reverse   | 4549687               | 17     | TTCCCTGGATCAAGCTG    |
| colony2,3,4        | Forward   | 4318791               | 18     | GACGATCAACAGGGCACC   |
| colony2,3,4        | Reverse   | 4319424               | 18     | ACCTGGACGGTTGGACAG   |
| colony5            | Forward   | 1942918               | 16     | GCGTTGCTCCAGCCCC     |
| colony5            | Reverse   | 1943406               | 15     | CTGGCGGCGTCGTAC      |
| colony6            | Forward   | 1712456               | 16     | GGAGATCTTGAGGACG     |
| colony6            | Reverse   | 1712951               | 16     | CAGACCTGCGGCGAAG     |
| colony7            | Forward   | 948210                | 15     | ACCACTCGGCGGCAG      |
| colony7            | Reverse   | 948749                | 18     | GCGCAGTTGATGATCTCG   |
| colony8            | Forward   | 2423961               | 15     | CGCTGAGCGTCGCCA      |
| colony8            | Reverse   | 2424501               | 17     | CGGCAGACTGGTGGGCA    |

<sup>a</sup>Position of 5' end of Ccl3 genome sequence (NC\_007777) to which a primer anneals.

Table S2. Mutations detected by next generation sequencing.

| Strain  | Position (nt) <sup>a</sup> | Mutant base | WT base <sup>b</sup> | Coverage <sup>c</sup> | No. WT base <sup>d</sup> | Ratio of WT base <sup>e</sup> | ID <sup>f</sup>                 | Annotation                                          |
|---------|----------------------------|-------------|----------------------|-----------------------|--------------------------|-------------------------------|---------------------------------|-----------------------------------------------------|
| 6A1     | 200831                     | T           | C                    | 1225                  | 52                       | 0.042                         | IGR Francci3_0169-Francci3_0170 |                                                     |
| 6A1     | 1011977                    | T           | A                    | 11                    | 0                        | 0.000                         | IGR Francci3_0868-Francci3_0869 |                                                     |
| 6A1     | 1172483                    | A           | G                    | 179                   | 4                        | 0.022                         | Francci3_0989                   | carbamoyl-phosphate synthase L chain, ATP-binding   |
| 6A1     | 1212645                    | A           | G                    | 397                   | 16                       | 0.040                         | Francci3_1017                   | hypothetical protein                                |
| 6A1     | 1986198                    | T           | C                    | 891                   | 46                       | 0.052                         | Francci3_1652                   | NADPH-dependent FMN reductase                       |
| 6A1     | 3340080                    | T           | C                    | 41                    | 1                        | 0.024                         | Francci3_2835                   | protein tyrosine/serine phosphatase                 |
| 6A1     | 4262098                    | A           | G                    | 816                   | 23                       | 0.028                         | IGR Francci3_3562-Francci3_3563 |                                                     |
| 6A1     | 4476362                    | A           | G                    | 91                    | 0                        | 0.000                         | Francci3_3740                   | diguanylate cyclase/phosphodiesterase               |
| 6A1     | 4508907                    | A           | G                    | 420                   | 24                       | 0.057                         | Francci3_3760                   | signal transduction histidine kinase                |
| colony1 | 3444812                    | T           | C                    | 159                   | 4                        | 0.025                         | IGR Francci3_2923-Francci3_2924 |                                                     |
| colony1 | 3610715                    | T           | C                    | 287                   | 5                        | 0.017                         | Francci3_3042                   | acyl-CoA dehydrogenase-like                         |
| colony1 | 3809698                    | C           | T                    | 4                     | 0                        | 0.000                         | Francci3_3216                   | hypothetical protein                                |
| colony1 | 3916026                    | T           | C                    | 20                    | 2                        | 0.100                         | Francci3_3305                   | Type IV secretory pathway VirD4 components-like     |
| colony1 | 4384188                    | T           | C                    | 267                   | 6                        | 0.022                         | IGR Francci3_3662-Francci3_3663 |                                                     |
| colony1 | 4549489                    | A           | G                    | 117                   | 8                        | 0.068                         | Francci3_3796                   | peptidase M16-like                                  |
| colony1 | 4630236                    | T           | C                    | 40                    | 1                        | 0.025                         | Francci3_3866                   | NUDIX hydrolase                                     |
| colony1 | 4649421                    | T           | C                    | 310                   | 10                       | 0.032                         | IGR Francci3_3885-Francci3_3886 |                                                     |
| colony1 | 4814994                    | T           | C                    | 683                   | 9                        | 0.013                         | Francci3_4027                   | LuxR family transcriptional regulator               |
| colony2 | 113563                     | A           | C                    | 9                     | 1                        | 0.111                         | Francci3_0092                   | hypothetical protein                                |
| colony2 | 214881                     | A           | G                    | 230                   | 0                        | 0.000                         | Francci3_0182                   | glyoxalase/bleomycin resistance protein/dioxygenase |
| colony2 | 245012                     | A           | G                    | 608                   | 8                        | 0.013                         | IGR Francci3_0205-Francci3_0207 |                                                     |
| colony2 | 755715                     | T           | C                    | 96                    | 2                        | 0.021                         | Francci3_0660                   | geranylgeranyl reductase                            |
| colony2 | 909997                     | T           | C                    | 31                    | 0                        | 0.000                         | Francci3_0781                   | type II secretion system protein                    |
| colony2 | 1116519                    | T           | C                    | 401                   | 5                        | 0.012                         | Francci3_0947                   | FHA domain-containing protein                       |
| colony2 | 1251205                    | C           | G                    | 6                     | 0                        | 0.000                         | Francci3_1052                   | hypothetical protein                                |
| colony2 | 1776439                    | A           | G                    | 69                    | 1                        | 0.014                         | Francci3_1484                   | cysteine dioxygenase type I                         |
| colony2 | 1991103                    | C           | T                    | 6                     | 1                        | 0.167                         | Francci3_1657                   | glycerol kinase                                     |
| colony2 | 2377470                    | G           | T                    | 4                     | 0                        | 0.000                         | Francci3_2022                   | transcriptional regulator                           |
| colony2 | 2440216                    | A           | G                    | 67                    | 1                        | 0.015                         | Francci3_2075                   | aminotransferase                                    |
| colony2 | 2801764                    | T           | C                    | 151                   | 2                        | 0.013                         | Francci3_2413                   | major facilitator transporter                       |
| colony2 | 2910081                    | A           | G                    | 651                   | 11                       | 0.017                         | IGR Francci3_2466-Francci3_2467 |                                                     |

| Strain  | Position (nt) <sup>a</sup> | Mutant base | WT base <sup>b</sup> | Coverage <sup>c</sup> | No. WT base <sup>d</sup> | Ratio of WT base <sup>e</sup> | ID <sup>f</sup>                 | Annotation                                             |
|---------|----------------------------|-------------|----------------------|-----------------------|--------------------------|-------------------------------|---------------------------------|--------------------------------------------------------|
| colony2 | 4075193                    | T           | C                    | 244                   | 8                        | 0.033                         | Francci3_3427                   | hypothetical protein                                   |
| colony2 | 4217197                    | T           | C                    | 483                   | 6                        | 0.012                         | IGR Francci3_3528-Francci3_3530 |                                                        |
| colony2 | 4318977                    | T           | C                    | 286                   | 2                        | 0.007                         | Francci3_3617                   | diguanylate cyclase/phosphodiesterase                  |
| colony2 | 4902347                    | A           | G                    | 254                   | 8                        | 0.031                         | Francci3_4093                   | NUDIX hydrolase                                        |
| colony2 | 4921610                    | T           | C                    | 374                   | 4                        | 0.011                         | Francci3_4118                   | hypothetical protein                                   |
| colony2 | 4983255                    | C           | T                    | 4                     | 1                        | 0.250                         | Francci3_4179                   | hypothetical protein                                   |
| colony2 | 5290936                    | G           | C                    | 4                     | 1                        | 0.250                         | Francci3_4425                   | serine/threonine protein kinase                        |
| colony3 | 755715                     | T           | C                    | 161                   | 6                        | 0.037                         | Francci3_0660                   | geranylgeranyl reductase                               |
| colony3 | 1116519                    | T           | C                    | 769                   | 10                       | 0.013                         | Francci3_0947                   | FHA domain-containing protein                          |
| colony3 | 1776439                    | A           | G                    | 128                   | 2                        | 0.016                         | Francci3_1484                   | cysteine dioxygenase type I                            |
| colony3 | 1993126                    | A           | G                    | 131                   | 0                        | 0.000                         | Francci3_1658                   | hypothetical protein                                   |
| colony3 | 2195005                    | G           | T                    | 78                    | 3                        | 0.038                         | Francci3_1861                   | 2-dehydropantoate 2-reductase                          |
| colony3 | 2318177                    | T           | C                    | 54                    | 3                        | 0.056                         | Francci3_1976                   | amino acid adenylation                                 |
| colony3 | 2553579                    | T           | C                    | 1549                  | 37                       | 0.024                         | Francci3_2179                   | hypothetical protein                                   |
| colony3 | 2801764                    | T           | C                    | 179                   | 5                        | 0.028                         | Francci3_2413                   | major facilitator transporter                          |
| colony3 | 2918202                    | T           | C                    | 1051                  | 33                       | 0.031                         | IGR Francci3_2473-Francci3_2474 |                                                        |
| colony3 | 3425853                    | C           | G                    | 4                     | 1                        | 0.250                         | Francci3_2909                   | peptidase S9, prolyl oligopeptidase active site region |
| colony3 | 3999160                    | A           | G                    | 69                    | 2                        | 0.029                         | Francci3_3370                   | cobalamin B12-binding                                  |
| colony3 | 4318977                    | T           | C                    | 539                   | 13                       | 0.024                         | Francci3_3617                   | diguanylate cyclase/phosphodiesterase                  |
| colony3 | 4425344                    | T           | C                    | 76                    | 2                        | 0.026                         | Francci3_3688                   | hypothetical protein                                   |
| colony3 | 4631958                    | T           | C                    | 97                    | 3                        | 0.031                         | Francci3_3869                   | hypothetical protein                                   |
| colony3 | 5322012                    | A           | G                    | 134                   | 2                        | 0.015                         | Francci3_4451                   | acetyl-CoA acetyltransferase                           |
| colony4 | 140311                     | T           | C                    | 102                   | 1                        | 0.010                         | Francci3_0114                   | phage integrase                                        |
| colony4 | 424544                     | G           | C                    | 5                     | 1                        | 0.200                         | Francci3_0362                   | hypothetical protein                                   |
| colony4 | 755715                     | T           | C                    | 86                    | 6                        | 0.070                         | Francci3_0660                   | geranylgeranyl reductase                               |
| colony4 | 887559                     | T           | C                    | 7                     | 1                        | 0.143                         | Francci3_0762                   | putative integral membrane protein                     |
| colony4 | 1116519                    | T           | C                    | 570                   | 11                       | 0.019                         | Francci3_0947                   | FHA domain-containing protein                          |
| colony4 | 1177025                    | A           | G                    | 573                   | 21                       | 0.037                         | Francci3_0991                   | acyl transferase region                                |
| colony4 | 1446690                    | T           | C                    | 447                   | 19                       | 0.043                         | Francci3_1211                   | rod shape-determining protein MreB                     |
| colony4 | 1752341                    | C           | G                    | 4                     | 1                        | 0.250                         | Francci3_1460                   | peptidase C60, sortase A and B                         |
| colony4 | 1776439                    | A           | G                    | 62                    | 4                        | 0.065                         | Francci3_1484                   | cysteine dioxygenase type I                            |
| colony4 | 1790485                    | T           | C                    | 182                   | 4                        | 0.022                         | IGR Francci3_1495-Francci3_1496 |                                                        |

| Strain  | Position (nt) <sup>a</sup> | Mutant base | WT base <sup>b</sup> | Coverage <sup>c</sup> | No. WT base <sup>d</sup> | Ratio of WT base <sup>e</sup> | ID <sup>f</sup>                  | Annotation                                    |
|---------|----------------------------|-------------|----------------------|-----------------------|--------------------------|-------------------------------|----------------------------------|-----------------------------------------------|
| colony4 | 2078892                    | A           | G                    | 1025                  | 21                       | 0.020                         | Francci3_1745                    | hypothetical protein                          |
| colony4 | 2206561                    | T           | C                    | 230                   | 7                        | 0.030                         | Francci3_1871                    | hypothetical protein                          |
| colony4 | 2247733                    | C           | T                    | 23                    | 2                        | 0.087                         | Francci3_1913                    | OmpA/MotB                                     |
| colony4 | 2801764                    | T           | C                    | 127                   | 5                        | 0.039                         | Francci3_2413                    | major facilitator transporter                 |
| colony4 | 3148274                    | A           | G                    | 139                   | 1                        | 0.007                         | Francci3_2666                    | MMPL                                          |
| colony4 | 3473687                    | G           | C                    | 5                     | 1                        | 0.200                         | Francci3_2940                    | protein of unknown function DUF1524 RloF      |
| colony4 | 4193176                    | A           | G                    | 242                   | 7                        | 0.029                         | Francci3_3508                    | transcriptional regulator NrdR                |
| colony4 | 4318977                    | T           | C                    | 358                   | 10                       | 0.028                         | Francci3_3617                    | diguanylate cyclase/phosphodiesterase         |
| colony4 | 4634847                    | C           | A                    | 4                     | 1                        | 0.250                         | Francci3_3872                    | hypothetical protein                          |
| colony4 | 4677327                    | G           | C                    | 7                     | 0                        | 0.000                         | Francci3_3908                    | hypothetical protein                          |
| colony5 | 54308                      | A           | G                    | 103                   | 10                       | 0.097                         | Francci3_0044                    | serine/threonine protein kinase               |
| colony5 | 141500                     | A           | G                    | 1675                  | 67                       | 0.040                         | Francci3_0114                    | phage integrase                               |
| colony5 | 498466                     | A           | G                    | 812                   | 6                        | 0.007                         | IGR Francci3_0419-Francci3_R0012 |                                               |
| colony5 | 629808                     | T           | C                    | 193                   | 6                        | 0.031                         | Francci3_0543                    | NADH-quinone oxidoreductase, F subunit        |
| colony5 | 1450426                    | T           | C                    | 15                    | 2                        | 0.133                         | Francci3_1214                    | peptidoglycan glycosyltransferase             |
| colony5 | 1515535                    | T           | C                    | 31                    | 1                        | 0.032                         | Francci3_1269                    | CBS                                           |
| colony5 | 1943172                    | T           | C                    | 123                   | 3                        | 0.024                         | Francci3_1619                    | extracellular ligand-binding receptor         |
| colony5 | 1960376                    | T           | C                    | 1096                  | 43                       | 0.039                         | Francci3_1631                    | excinuclease ABC subunit A                    |
| colony5 | 1965419                    | C           | T                    | 6                     | 1                        | 0.167                         | Francci3_1633                    | excinuclease ABC subunit C                    |
| colony5 | 2106877                    | A           | G                    | 147                   | 9                        | 0.061                         | IGR Francci3_1770-Francci3_1771  |                                               |
| colony5 | 2195005                    | G           | T                    | 28                    | 4                        | 0.143                         | Francci3_1861                    | 2-dehydropantoate 2-reductase                 |
| colony5 | 2316337                    | A           | G                    | 985                   | 46                       | 0.047                         | IGR Francci3_1975-Francci3_1976  |                                               |
| colony5 | 2458991                    | A           | G                    | 110                   | 8                        | 0.073                         | Francci3_2090                    | 3-oxoacyl-(acyl carrier protein) synthase III |
| colony5 | 2930887                    | A           | G                    | 1865                  | 43                       | 0.023                         | IGR Francci3_2484-Francci3_2485  |                                               |
| colony5 | 2959308                    | T           | C                    | 1266                  | 24                       | 0.019                         | Francci3_2506                    | hydantoinase B/oxoprolinase                   |
| colony5 | 3211711                    | A           | G                    | 157                   | 6                        | 0.038                         | Francci3_2727                    | hypothetical protein                          |
| colony5 | 3717464                    | A           | G                    | 242                   | 4                        | 0.017                         | Francci3_3143                    | L-glutamine synthetase                        |
| colony5 | 5202265                    | T           | C                    | 6                     | 1                        | 0.167                         | Francci3_4356                    | ATPase AAA-2                                  |
| colony6 | 1712679                    | A           | G                    | 90                    | 1                        | 0.011                         | Francci3_1421                    | hypothetical protein                          |
| colony6 | 2440561                    | A           | G                    | 147                   | 3                        | 0.020                         | Francci3_2075                    | aminotransferase                              |
| colony6 | 3362356                    | T           | C                    | 221                   | 4                        | 0.018                         | Francci3_2851                    | beta-ketoacyl synthase                        |
| colony6 | 3444812                    | T           | C                    | 149                   | 7                        | 0.047                         | IGR Francci3_2923-Francci3_2924  |                                               |

| Strain  | Position (nt) <sup>a</sup> | Mutant base | WT base <sup>b</sup> | Coverage <sup>c</sup> | No. WT base <sup>d</sup> | Ratio of WT base <sup>e</sup> | ID <sup>f</sup>                  | Annotation                                           |
|---------|----------------------------|-------------|----------------------|-----------------------|--------------------------|-------------------------------|----------------------------------|------------------------------------------------------|
| colony6 | 3610715                    | T           | C                    | 295                   | 13                       | 0.044                         | Francci3_3042                    | acyl-CoA dehydrogenase-like                          |
| colony6 | 3729412                    | A           | G                    | 35                    | 1                        | 0.029                         | Francci3_3150                    | hypothetical protein                                 |
| colony6 | 3937737                    | C           | G                    | 3                     | 1                        | 0.333                         | Francci3_3323                    | hypothetical protein                                 |
| colony6 | 4384188                    | T           | C                    | 369                   | 9                        | 0.024                         | IGR Francci3_3662-Francci3_3663  |                                                      |
| colony6 | 4511418                    | G           | A                    | 5                     | 1                        | 0.200                         | Francci3_3762                    | dithiobiotin synthetase                              |
| colony6 | 4630236                    | T           | C                    | 49                    | 0                        | 0.000                         | Francci3_3866                    | NUDIX hydrolase                                      |
| colony6 | 4649421                    | T           | C                    | 315                   | 15                       | 0.048                         | IGR Francci3_3885-Francci3_3886  |                                                      |
| colony6 | 4814994                    | T           | C                    | 666                   | 7                        | 0.011                         | Francci3_4027                    | LuxR family transcriptional regulator                |
| colony7 | 230604                     | A           | G                    | 114                   | 0                        | 0.000                         | Francci3_0194                    | hypothetical protein                                 |
| colony7 | 491327                     | T           | C                    | 64                    | 1                        | 0.016                         | Francci3_0412                    | cell divisionFtsK/SpoIIIE                            |
| colony7 | 755715                     | T           | C                    | 78                    | 0                        | 0.000                         | Francci3_0660                    | geranylgeranyl reductase                             |
| colony7 | 948422                     | A           | G                    | 167                   | 0                        | 0.000                         | Francci3_0815                    | NUDIX hydrolase                                      |
| colony7 | 1116519                    | T           | C                    | 87                    | 2                        | 0.023                         | Francci3_0947                    | FHA domain-containing protein                        |
| colony7 | 1431150                    | A           | G                    | 3                     | 1                        | 0.333                         | Francci3_1199                    | putative ATP-binding protein                         |
| colony7 | 1703462                    | A           | G                    | 31                    | 0                        | 0.000                         | Francci3_1413                    | UDP-N-acetylmuramoyl-L-alanyl-D-glutamate synthetase |
| colony7 | 1776439                    | A           | G                    | 43                    | 1                        | 0.023                         | Francci3_1484                    | cysteine dioxygenase type I                          |
| colony7 | 1853798                    | A           | G                    | 231                   | 2                        | 0.009                         | IGR Francci3_1543-Francci3_1544  |                                                      |
| colony7 | 2801764                    | T           | C                    | 53                    | 0                        | 0.000                         | Francci3_2413                    | major facilitator transporter                        |
| colony7 | 3621843                    | A           | G                    | 63                    | 0                        | 0.000                         | IGR Francci3_3055-Francci3_3056  |                                                      |
| colony7 | 3714154                    | A           | G                    | 8                     | 0                        | 0.000                         | IGR Francci3_3140-Francci3_3141  |                                                      |
| colony7 | 3816051                    | T           | C                    | 83                    | 1                        | 0.012                         | Francci3_3221                    | hypothetical protein                                 |
| colony7 | 4318977                    | T           | C                    | 155                   | 2                        | 0.013                         | Francci3_3617                    | diguanylate cyclase/phosphodiesterase                |
| colony8 | 498466                     | A           | G                    | 167                   | 0                        | 0.000                         | IGR Francci3_0419-Francci3_R0012 |                                                      |
| colony8 | 550578                     | G           | C                    | 10                    | 1                        | 0.100                         | Francci3_0470                    | histidine kinase                                     |
| colony8 | 629808                     | T           | C                    | 43                    | 0                        | 0.000                         | Francci3_0543                    | NADH-quinone oxidoreductase, F subunit               |
| colony8 | 1132805                    | A           | G                    | 121                   | 2                        | 0.017                         | Francci3_0959                    | hypothetical protein                                 |
| colony8 | 1301931                    | A           | T                    | 12                    | 0                        | 0.000                         | Francci3_1089                    | transposase, IS4                                     |
| colony8 | 2316337                    | A           | G                    | 168                   | 1                        | 0.006                         | IGR Francci3_1975-Francci3_1976  |                                                      |
| colony8 | 2424161                    | T           | C                    | 56                    | 2                        | 0.036                         | IGR Francci3_2059-Francci3_2060  |                                                      |
| colony8 | 2424201                    | T           | C                    | 9                     | 1                        | 0.111                         | Francci3_2060                    | hypothetical protein                                 |
| colony8 | 2930887                    | A           | G                    | 397                   | 2                        | 0.005                         | IGR Francci3_2484-Francci3_2485  |                                                      |
| colony8 | 3211711                    | A           | G                    | 59                    | 1                        | 0.017                         | Francci3_2727                    | hypothetical protein                                 |



| Strain  | Position (nt) <sup>a</sup> | Mutant base | WT base <sup>b</sup> | Coverage <sup>c</sup> | No. WT base <sup>d</sup> | Ratio of WT base <sup>e</sup> | ID <sup>f</sup>                  | Annotation                                             |
|---------|----------------------------|-------------|----------------------|-----------------------|--------------------------|-------------------------------|----------------------------------|--------------------------------------------------------|
| colony8 | 4381115                    | T           | C                    | 8                     | 1                        | 0.125                         | Francci3_3660                    | putative transcriptional regulator                     |
| colony8 | 4457541                    | C           | G                    | 6                     | 1                        | 0.167                         | Francci3_3723                    | homoserine kinase                                      |
| colony8 | 4903846                    | A           | G                    | 71                    | 6                        | 0.085                         | IGR Francci3_4094-Francci3_4095  |                                                        |
| colony8 | 5391784                    | G           | C                    | 6                     | 1                        | 0.167                         | Francci3_4516                    | hypothetical protein                                   |
| colony9 | 498466                     | A           | G                    | 516                   | 1                        | 0.002                         | IGR Francci3_0419-Francci3_R0012 |                                                        |
| colony9 | 629808                     | T           | C                    | 200                   | 0                        | 0.000                         | Francci3_0543                    | NADH-quinone oxidoreductase, F subunit                 |
| colony9 | 880957                     | A           | G                    | 417                   | 2                        | 0.005                         | Francci3_0757                    | extracellular solute-binding protein                   |
| colony9 | 1564048                    | T           | C                    | 259                   | 0                        | 0.000                         | Francci3_1306                    | oxidoreductase-like                                    |
| colony9 | 1582887                    | A           | G                    | 119                   | 0                        | 0.000                         | Francci3_1319                    | hypothetical protein                                   |
| colony9 | 2316337                    | A           | G                    | 662                   | 5                        | 0.008                         | IGR Francci3_1975-Francci3_1976  |                                                        |
| colony9 | 2930887                    | A           | G                    | 1121                  | 12                       | 0.011                         | IGR Francci3_2484-Francci3_2485  |                                                        |
| colony9 | 3042202                    | A           | G                    | 124                   | 3                        | 0.024                         | Francci3_2576                    | hypothetical protein                                   |
| colony9 | 3211711                    | A           | G                    | 140                   | 0                        | 0.000                         | Francci3_2727                    | hypothetical protein                                   |
| colony9 | 3425584                    | C           | G                    | 5                     | 0                        | 0.000                         | Francci3_2909                    | peptidase S9, prolyl oligopeptidase active site region |
| colony9 | 4823021                    | C           | A                    | 6                     | 0                        | 0.000                         | Francci3_4037                    | molybdopterin adenylyltransferase                      |
| colony9 | 5129264                    | C           | G                    | 12                    | 0                        | 0.000                         | Francci3_4298                    | type II secretion system protein                       |
| shiro1  | 498466                     | A           | G                    | 427                   | 0                        | 0.000                         | IGR Francci3_0419-Francci3_R0012 |                                                        |
| shiro1  | 1208408                    | T           | C                    | 217                   | 9                        | 0.041                         | Francci3_1014                    | hypothetical protein                                   |
| shiro1  | 2316337                    | A           | G                    | 511                   | 6                        | 0.012                         | IGR Francci3_1975-Francci3_1976  |                                                        |
| shiro1  | 2930887                    | A           | G                    | 851                   | 10                       | 0.012                         | IGR Francci3_2484-Francci3_2485  |                                                        |
| shiro1  | 3026410                    | A           | G                    | 256                   | 4                        | 0.016                         | Francci3_2567                    | putative hydrolase                                     |
| shiro1  | 3211711                    | A           | G                    | 98                    | 3                        | 0.031                         | Francci3_2727                    | hypothetical protein                                   |
| shiro1  | 3235654                    | A           | G                    | 35                    | 0                        | 0.000                         | Francci3_2745                    | hypothetical protein                                   |
| shiro2  | 498466                     | A           | G                    | 564                   | 1                        | 0.002                         | IGR Francci3_0419-Francci3_R0012 |                                                        |
| shiro2  | 629808                     | T           | C                    | 121                   | 2                        | 0.017                         | Francci3_0543                    | NADH-quinone oxidoreductase, F subunit                 |
| shiro2  | 1423887                    | G           | C                    | 3                     | 1                        | 0.333                         | Francci3_1190                    | hypothetical protein                                   |
| shiro2  | 2285845                    | C           | G                    | 11                    | 0                        | 0.000                         | Francci3_1945                    | (NiFe) hydrogenase maturation protein HypF             |
| shiro2  | 2316337                    | A           | G                    | 628                   | 7                        | 0.011                         | IGR Francci3_1975-Francci3_1976  |                                                        |
| shiro2  | 2768445                    | A           | G                    | 135                   | 1                        | 0.007                         | Francci3_2390                    | glycosyl transferase family protein                    |
| shiro2  | 2930887                    | A           | G                    | 1213                  | 10                       | 0.008                         | IGR Francci3_2484-Francci3_2485  |                                                        |
| shiro2  | 3211711                    | A           | G                    | 114                   | 0                        | 0.000                         | Francci3_2727                    | hypothetical protein                                   |
| shiro2  | 3235654                    | A           | G                    | 45                    | 2                        | 0.044                         | Francci3_2745                    | hypothetical protein                                   |

| Strain | Position (nt) <sup>a</sup> | Mutant base | WT base <sup>b</sup> | Coverage <sup>c</sup> | No. WT base <sup>d</sup> | Ratio of WT base <sup>e</sup> | ID <sup>f</sup>                 | Annotation                                       |
|--------|----------------------------|-------------|----------------------|-----------------------|--------------------------|-------------------------------|---------------------------------|--------------------------------------------------|
| shiro2 | 3714154                    | A           | G                    | 9                     | 0                        | 0.000                         | IGR Francci3_3140-Francci3_3141 |                                                  |
| shiro2 | 4949435                    | G           | T                    | 5                     | 0                        | 0.000                         | Francci3_4149                   | integrase                                        |
| shiro3 | 398331                     | A           | G                    | 586                   | 18                       | 0.031                         | Francci3_0343                   | inner-membrane translocator                      |
| shiro3 | 755715                     | T           | C                    | 127                   | 2                        | 0.016                         | Francci3_0660                   | geranylgeranyl reductase                         |
| shiro3 | 1049059                    | A           | C                    | 135                   | 2                        | 0.015                         | Francci3_0906                   | Type IV secretory pathway VirD4 components-like  |
| shiro3 | 1116519                    | T           | C                    | 398                   | 4                        | 0.010                         | Francci3_0947                   | FHA domain-containing protein                    |
| shiro3 | 1183365                    | A           | G                    | 1059                  | 29                       | 0.027                         | Francci3_0994                   | hypothetical protein                             |
| shiro3 | 1408614                    | T           | C                    | 137                   | 6                        | 0.044                         | Francci3_1178                   | AMP-dependent synthetase and ligase              |
| shiro3 | 1868217                    | G           | T                    | 6                     | 1                        | 0.167                         | Francci3_1558                   | cell envelope-related transcriptional attenuator |
| shiro3 | 2145810                    | A           | G                    | 232                   | 5                        | 0.022                         | Francci3_1810                   | uncharacterized FAD-dependent dehydrogenase      |
| shiro3 | 2161726                    | T           | C                    | 139                   | 2                        | 0.014                         | Francci3_1823                   | putative O-methyltransferase                     |
| shiro3 | 2801764                    | T           | C                    | 146                   | 1                        | 0.007                         | Francci3_2413                   | major facilitator transporter                    |
| shiro3 | 3174296                    | A           | G                    | 360                   | 9                        | 0.025                         | Francci3_2688                   | Rieske (2Fe-2S) protein                          |
| shiro3 | 3267212                    | T           | C                    | 124                   | 1                        | 0.008                         | Francci3_2770                   | 4-hydroxyphenylacetate 3-hydroxylase             |
| shiro3 | 4309260                    | T           | C                    | 269                   | 5                        | 0.019                         | Francci3_3607                   | DEAD/DEAH box helicase-like                      |
| shiro3 | 4318977                    | T           | C                    | 355                   | 2                        | 0.006                         | Francci3_3617                   | diguanylate cyclase/phosphodiesterase            |
| shiro3 | 4672005                    | A           | G                    | 641                   | 9                        | 0.014                         | IGR Francci3_3903-Francci3_3904 |                                                  |

<sup>a</sup>Position of the base in the reference genome sequence of *Frankia* CcI3 in public database (NC\_007777) .

<sup>b</sup>Base reported in the reference genome sequence.

<sup>c</sup>Total number of reads mapped on the base.

<sup>d</sup>The number of reads that showed WT base.

<sup>e</sup>No. WT base / Coverage.

<sup>f</sup>IGR represents ingergenic region.
